# Supplementary material
Source: PubMed Central journal article supplement (PMC4796929)
Supplement: ismej2015165x1.pdf [file ismej2015165x1.pdf]

## Supplementary Material

### Supplementary Figures

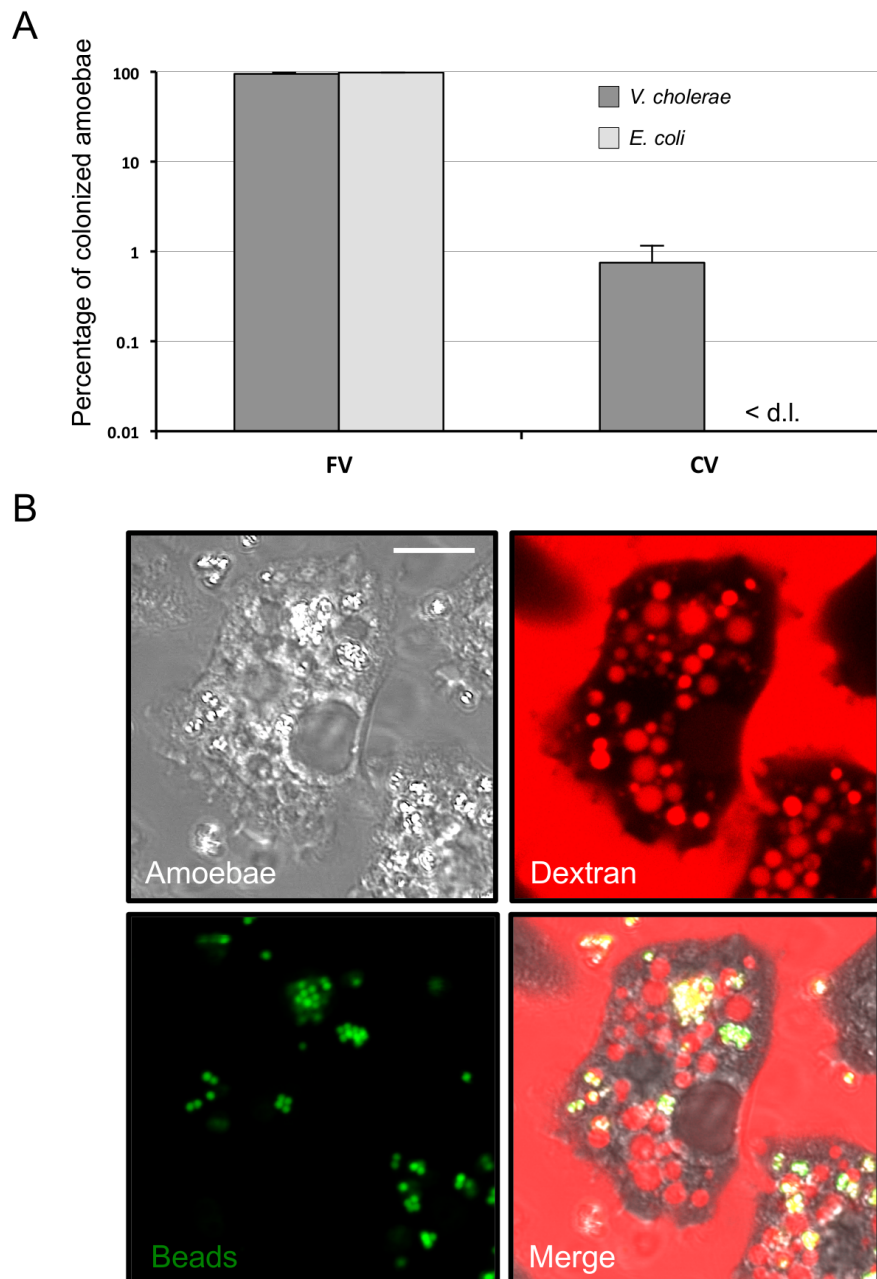

**Supplementary Figure S1. Intracellular localization of *V. cholerae* and *E. coli* after phagocytosis by *A. castellanii*.** (A) Quantification of colonized amoebae containing bacteria (*V. cholerae* and *E. coli*) inside food vacuoles (FV) and the contractile vacuole (CV). <math>< \text{d.l.}</math>, below detection limit of 0.027%; additional visual inspection of  $10^5$  amoebae for *E. coli*-colonized CVs confirmed these data (d.l. <math>< 0.001\%</math> in three independent experiments). (B) Fluorescent beads follow the phago-/endosomal pathway. Confocal images showing the colocalization of Fluoresbrite Yellow Green (YG) microspheres and Alexa 647-conjugated dextran (MW=10,000 Da). Image arrangement: transmission light image (labeled Amoebae), far-red channel (labeled Dextran), green channel (labeled Beads) and a merged image of all channels (labeled Merge). Scale bar: 10 $\mu\text{m}$ .

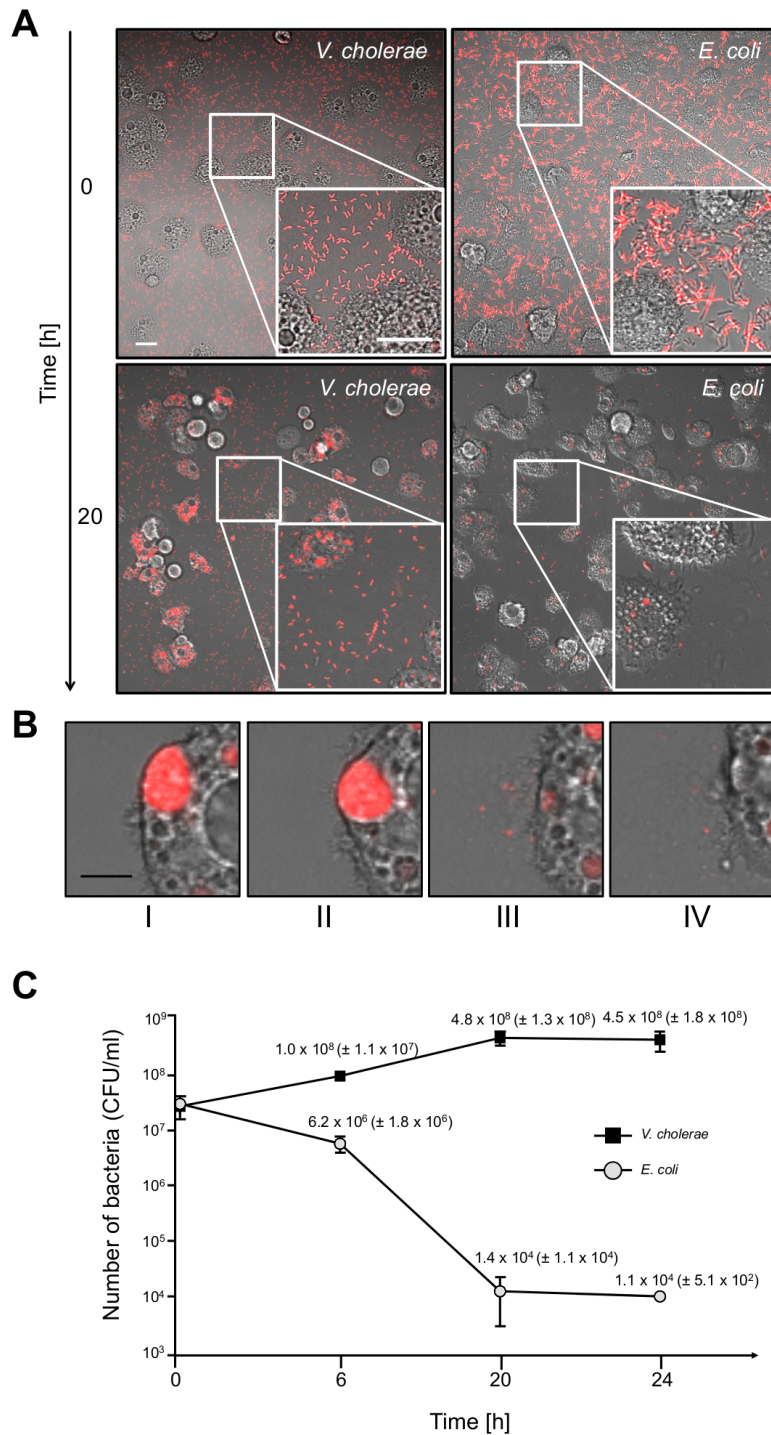

**Supplementary Figure S2. *A. castellanii* digests phagocytosed *E. coli*.** (A) Confocal images of *dsRed*-expressing *V. cholerae* and *E. coli* at the time of initial contact with the amoebae and 20h later. The time is indicated on the left. *V. cholerae* bacteria are detected around and inside amoebae at 20h p.p.c., whereas undigested extracellular *E. coli* cells are rarely detectable. Scale bars: 20 $\mu$ m. (B) Time-lapse confocal microscopy image series showing the exocytosis of a food vacuole without the release of intact *E. coli*. The relative time points (starting at 14h p.p.c.) are: I, t=0; II, t=90s; III, t= 180s and IV, t=300s. Scale bar: 10 $\mu$ m. (C) Kinetics of bacterial killing by *A. castellanii*. Survival was assessed by CFU enumeration of extra- and intracellular bacteria after 6h, 20h and 24h p.p.c., as indicated on the X-axis.

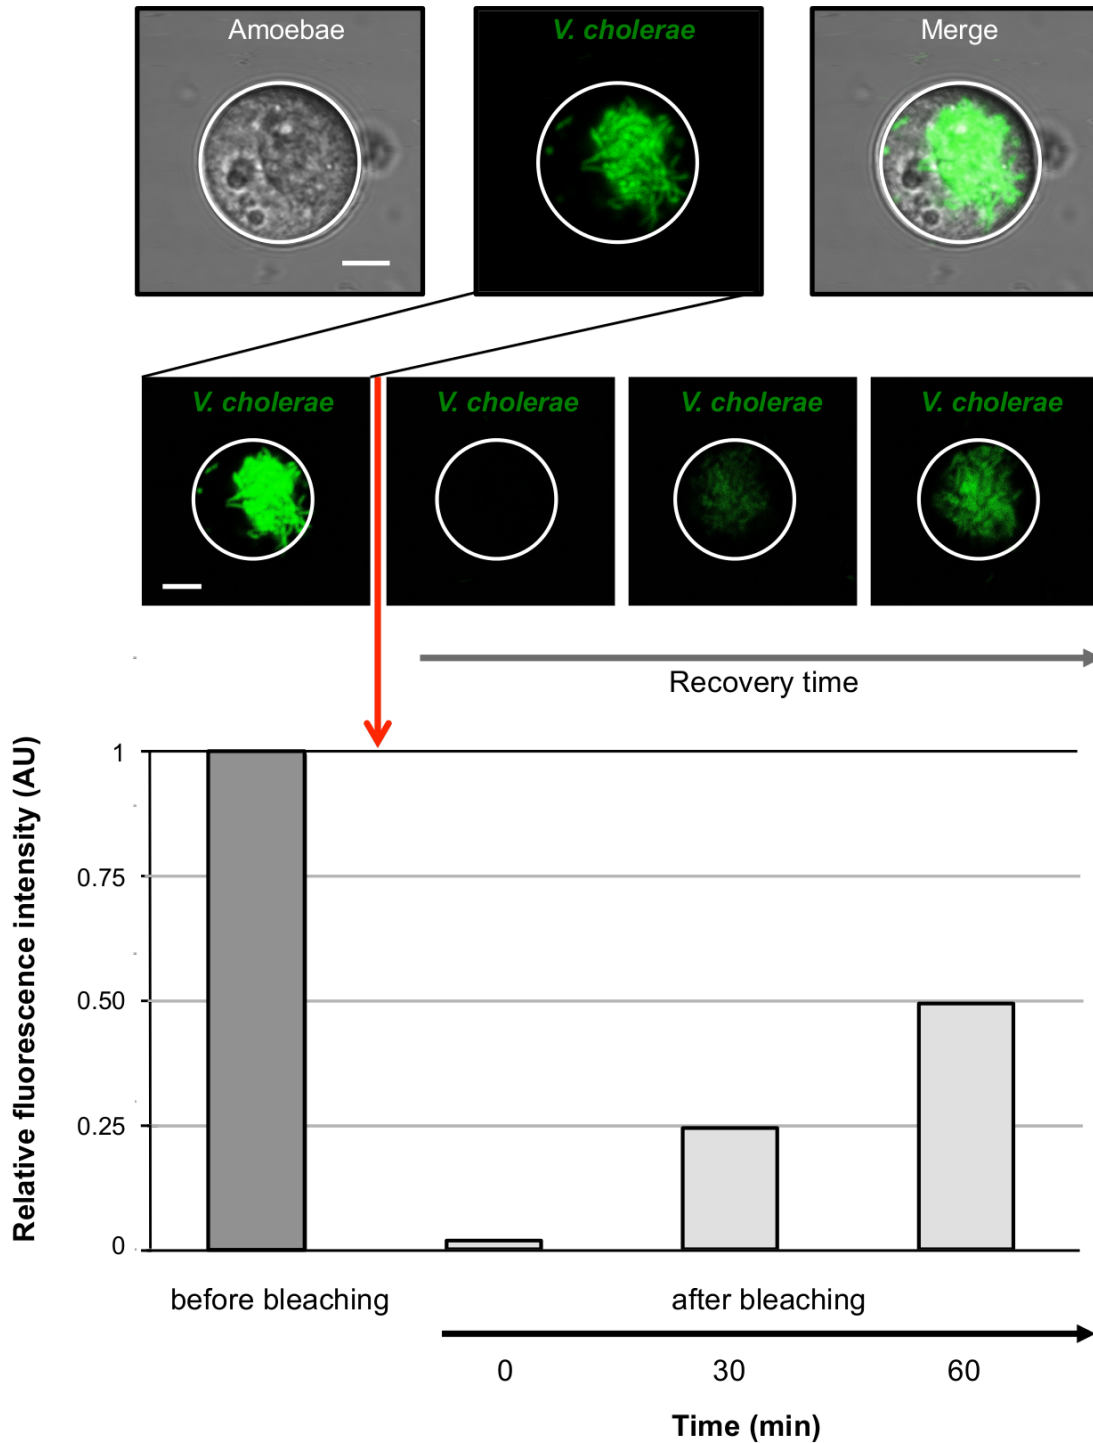

**Supplementary Figure S3. Bacterial viability within the amoebal CV.** Fluorescence recovery after photobleaching indicates intracellular viability of *V. cholerae*. A GFP-producing WT strain was incubated for 17h with *A. castellanii* before a colonized CV was bleached as described in the materials and methods section. The recovery of the GFP signal (shown on the Y-axis) within the bacteria was monitored over 60 min as indicated on the X-axis. Scale bar: 5 $\mu$ m.

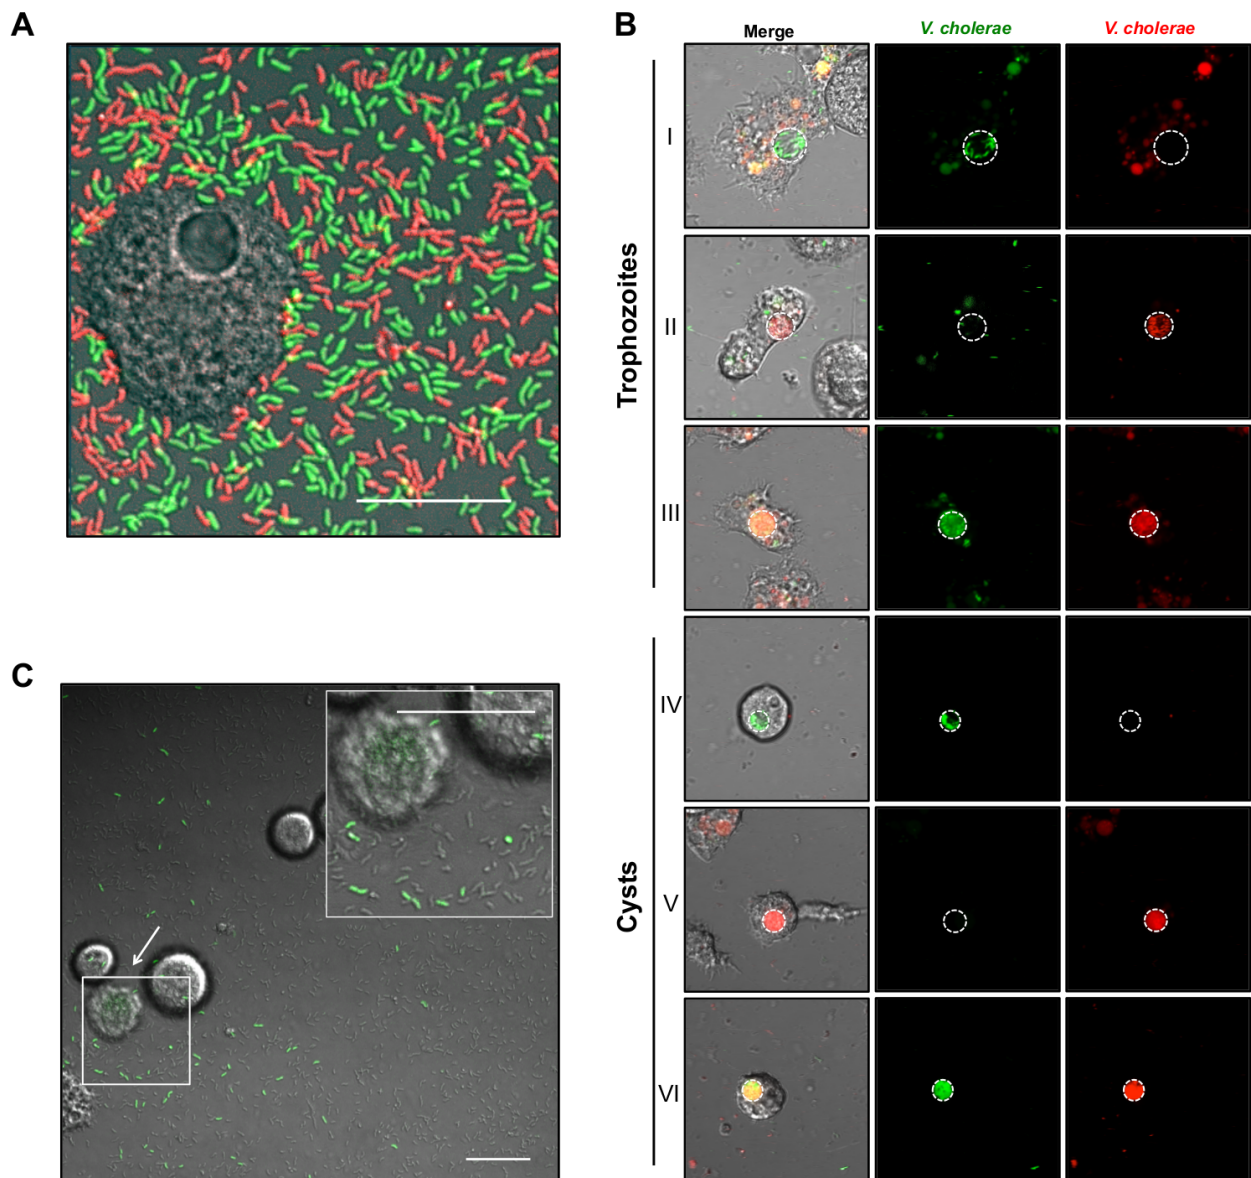

**Supplementary Figure S4. Intracellular growth of *V. cholerae*.** (A+B) Visualization of intracellular proliferation based on a mixed-color inoculation procedure. *V. cholerae* WT strains (GFP- and dsRed-producing) were mixed at a ratio of 1:1 and co-cultured with *A. castellanii*. (A) Enlarged image of *gfp*- and *dsRed*-expressing *V. cholerae* surrounding *A. castellanii* at  $t=0$ h. (B) Confocal images showing single-colored CVs within trophozoites (I, II) or cysts (IV, V) indicating the proliferation of a single or very few bacteria at 20h p.p.c. Mixed-color CVs (III, VI) were also observed (see Table 2 for quantification). Images from left to right: merged image of the two fluorescent channels and the transmitted light channel (amoebae), green channel (green-written *V. cholerae*), and red channel (red-written *V. cholerae*). (C) Release of growing bacteria from lysed cysts. The amoebae were co-incubated with the *V. cholerae* growth reporter strain for 24h. The lysis of the CV followed by the disintegration of the cyst (white arrow) results in the release of actively growing *gfp*(ASV)-expressing *V. cholerae*. Note the extracellular and non-fluorescent bacteria in the surrounding area. Scale bar for all panels: 20 $\mu$ m.

## Supplementary Movie legends

**Supplementary Movie S1. Internalization of *V. cholerae* by *A. castellanii*.** Time-lapse imaging of a GFP-producing WT *V. cholerae* strain co-cultured with *A. castellanii*. The movie starts at the first point of contact (t=0h) and lasts for 5h as indicated in the upper left corner. Shown are the merged signals between the transmission light channel (amoebae) and the GFP confocal channel (fluorescent *V. cholerae* cells).

**Supplementary Movie S2. Release of undigested *V. cholerae* cells from *A. castellanii*.** Time-lapse confocal microscopy imaging starting at 4.5h p.p.c. (t=0h, as indicated in the upper left corner). Shown are merged images of the transmission light (amoebae) and GFP signals (GFP-producing *V. cholerae*). The white boxed-area and the arrow highlight the release of undigested *V. cholerae*. See also Figure 2.

**Supplementary Movie S3. Colonization of the contractile vacuole (CV).** Time-lapse imaging as described for Supplementary Movie S2 starting at 5h p.p.c. The movie shows the vacuolar fusion and the bacterial transfer from digestive food vacuoles into a CV. See also Figure 3B.

**Supplementary Movie S4. CV lysis releases *V. cholerae* into the cyst's cytosol.** Time-lapse imaging starting at 16h p.p.c. (relative time t=0h as indicated in the left corner). Image arrangement as for Figure 4.

**Supplementary Movie S5. Viability of *V. cholerae* within the cyst's cytosol.** The time-lapse is a continuation of Supplementary Movie S4 (~ 18h p.p.c.) showing the motility of the bacteria inside the cytosol of the cyst. An increase of the fluorescent signal occurs over time. Image arrangement as for Figure 4.

**Supplementary Movie S6. Lysis occurs after disruption of the *V. cholerae*-containing cyst.** The time-lapse is a continuation of Supplementary Movie S5 (~21h p.p.c.) showing the release of *V. cholerae* cells into the surrounding, followed by the influx of dextran into the lysed cyst. Image arrangement as for Figure 4.

**Supplementary Table S1: Quantification of colonized CVs.**

| <i>A. castellanii</i> +                        | Percentage of colonized CVs <sup>#</sup> |
|------------------------------------------------|------------------------------------------|
| <i>E. coli</i>                                 | 0% ( $\pm 0$ )                           |
| <i>V. cholerae</i>                             | 1.0% ( $\pm 0.14$ )                      |
| beads                                          | 0% ( $\pm 0$ )                           |
| beads (in the presence of <i>E. coli</i> )     | 0% ( $\pm 0$ )                           |
| beads (in the presence of <i>V. cholerae</i> ) | 0.4 % ( $\pm 0.10$ )                     |

<sup>#</sup> Percentage values are averages derived from three independent biological experiments ( $\pm$  SD). 4400 amoebae were counted in total for each condition.
